# Supplementary material
Source: PubMed Central journal article supplement (PMC6756753)
Supplement: NIHMS1041988-supplement-supplemental_material.pdf [file NIHMS1041988-supplement-supplemental_material.pdf]

Supplemental Figure 1

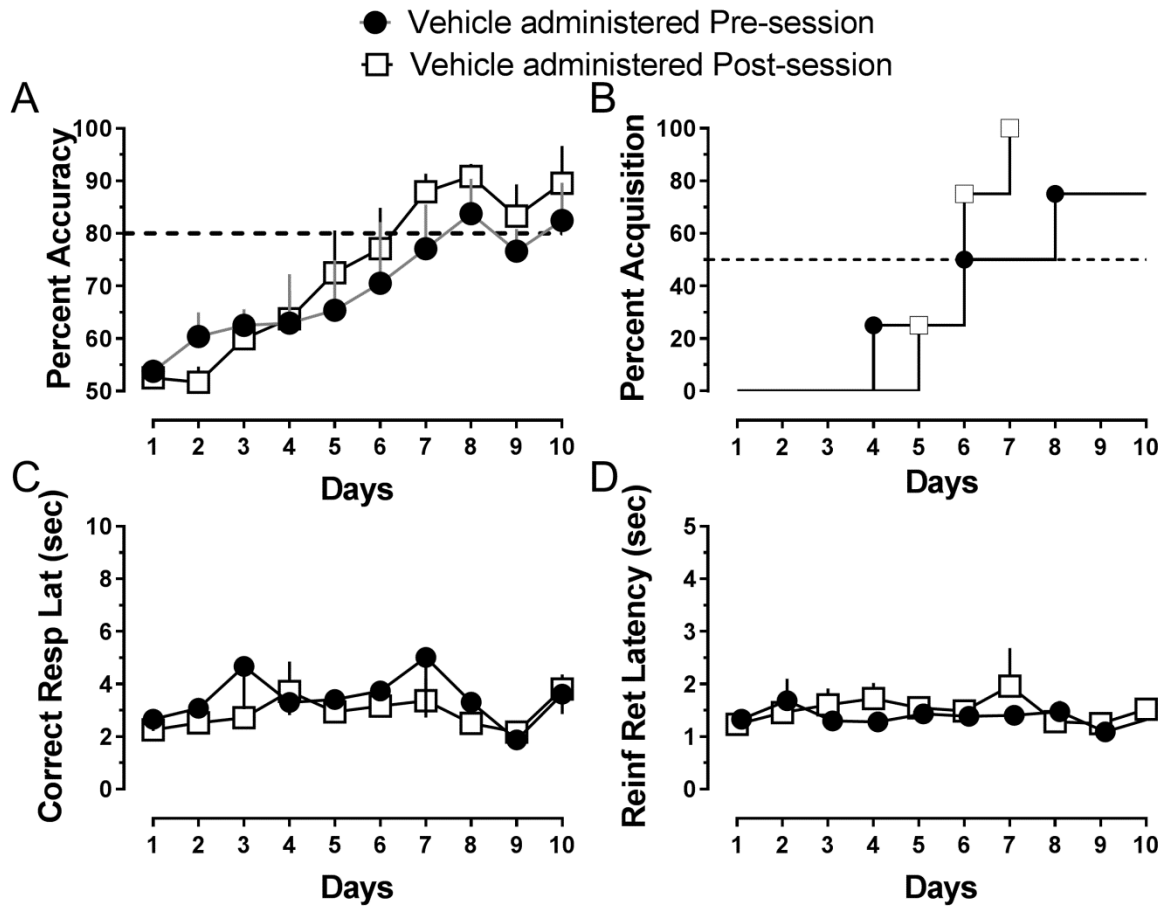

There were not differences in cognitive measures between mice that were administered vehicle once-daily 60 minutes prior to (filled circles) or immediately following (open squares) each test session (n=4 mice /group). A) Percent accuracy across the first 10 days of learning a pairwise discrimination (PWD) task. B) Percent of mice that acquired (>80% accuracy) across the 10 days of learning a PWD task. C) Average latency to respond for all correct trials, D) and average latency to retrieve the reinforcer after each correct trial across 10 days of learning a PWD task. All data shown as group average ( $\pm$  SEM).
